# Supplementary material
Source: Springer Nature journal article supplement (https://www.springermedizin.de/resource/supplementary/12958_2009_509_MOESM7_ESM.pdf/9568176)

 Alternatively used untranslated first exons

 Coding exons

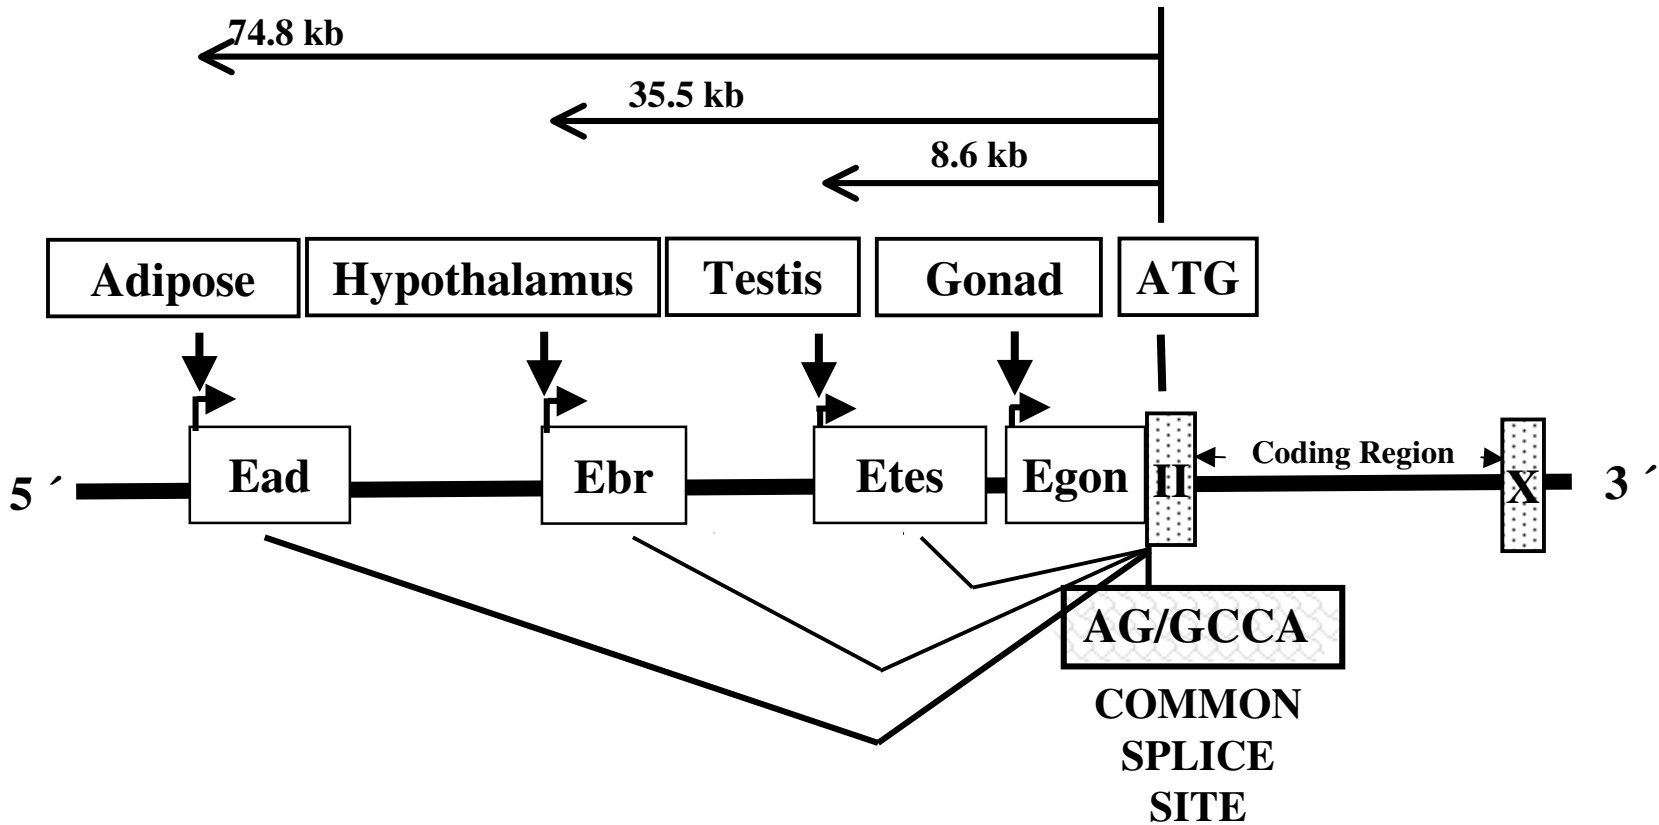

Supplement: MOESM7 [file 9568176]
